# Supplementary material
Source: PubMed Central journal article supplement (PMC5562283)
Supplement: NIHMS881407-supplement-1.pdf [file NIHMS881407-supplement-1.pdf]

## SUPPLEMENTAL FIGURES

**A**

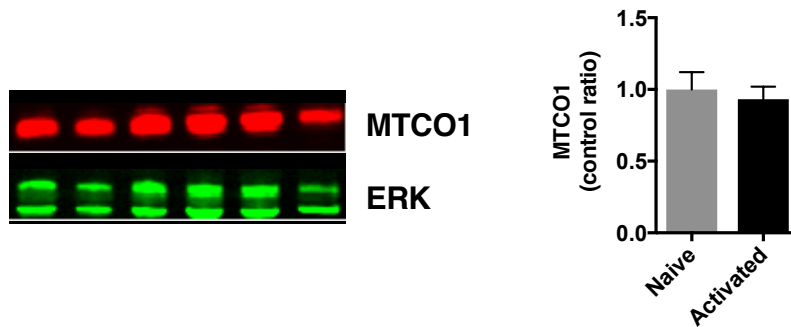

**B**

| Accession | Description                                                                                 | Gene ID | Ratio: (Stimulated) / (Control) | Control SE [%] | Stimulated SE [%] | Labeled Peptides |
|-----------|---------------------------------------------------------------------------------------------|---------|---------------------------------|----------------|-------------------|------------------|
| P00405    | Cytochrome c oxidase subunit 2 OS=Mus musculus GN=Mtco2 PE=1 SV=1                           | COX2    | 0.906                           | 11.01          | 36.53             | 6                |
| P19783    | Cytochrome c oxidase subunit 4 isoform 1, mitochondrial OS=Mus musculus GN=Cox4i1 PE=1 SV=2 | Cox4i1  | 0.982                           | 8.84           | 32.87             | 10               |
| P12787    | Cytochrome c oxidase subunit 5A, mitochondrial OS=Mus musculus GN=Cox5a PE=1 SV=2           | Cox5a   | 0.946                           | 18.15          | 10.72             | 6                |
| P19536    | Cytochrome c oxidase subunit 5B, mitochondrial OS=Mus musculus GN=Cox5b PE=1 SV=1           | Cox5b   | 1.028                           | 7.49           | 17.92             | 8                |
| P43024    | Cytochrome c oxidase subunit 6A1, mitochondrial OS=Mus musculus GN=Cox6a1 PE=1 SV=2         | Cox6a1  | 0.947                           | 7.86           | 19.23             | 2                |
| P56391    | Cytochrome c oxidase subunit 6B1 OS=Mus musculus GN=Cox6b1 PE=1 SV=2                        | Cox6b1  | 0.836                           | 1.78           | 17.1              | 7                |
| Q9CPQ1    | Cytochrome c oxidase subunit 6C OS=Mus musculus GN=Cox6c PE=1 SV=3                          | Cox6c   | 0.986                           | 10.42          | 38.83             | 3                |
| P48771    | Cytochrome c oxidase subunit 7A2, mitochondrial OS=Mus musculus GN=Cox7a2 PE=1 SV=2         | Cox7a2  | 0.964                           | 13.43          | 33.16             | 3                |
| P17665    | Cytochrome c oxidase subunit 7C, mitochondrial OS=Mus musculus GN=Cox7c PE=1 SV=1           | Cox7c   | 1.037                           | 5.55           | 27.92             | 2                |

**C**

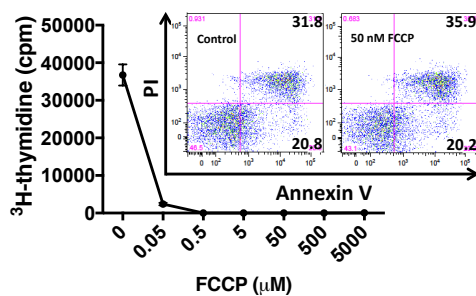

**D**

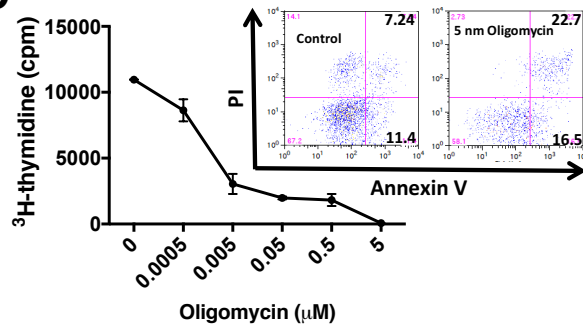

**Supplemental Figure 1: Mitochondrial proteins and cell proliferation.** Related to Figure 2. Mouse splenic T-cells were stimulated for 24 hours with anti-CD3/CD28. (A) Immunoblot for MTCO1 (complex IV) (N = 3 / condition). (B) Proteomic analysis of COX subunits (N = 3 / condition). (C) T-cell proliferation in the presence of a mitochondrial uncoupler, FCCP (N = 3 / condition). (D) T-cell proliferation in the presence of ATP synthase inhibitor, oligomycin (N = 3 / condition). MTCO1 = Mitochondrially Encoded Cytochrome C Oxidase I. Experiments were performed 3 or more times with representative data shown. FCCP = Carbonyl cyanide 4-(trifluoromethoxy)phenylhydrazone. \*P < 0.05.

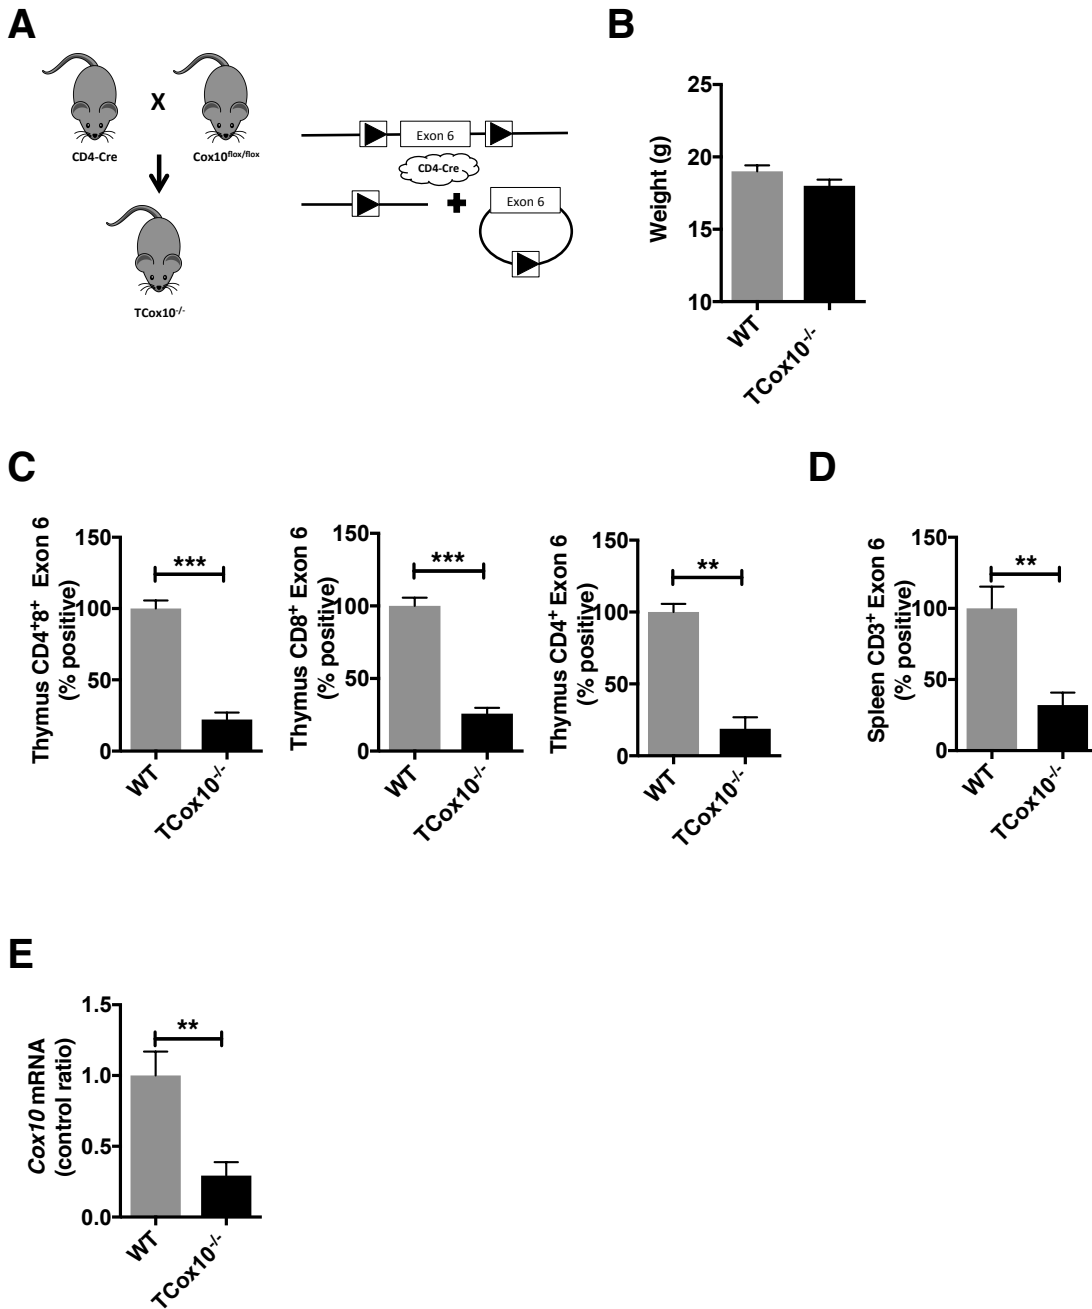

**Supplemental Figure 2: Model of T-cell COX deficiency TCox10<sup>-/-</sup>.** Related to Figure 3. (A) Breeding strategy. (B) Mouse weight (N = 3 / condition). (C) Thymic *Cox10* exon 6 deletion status by PCR using targeted primers (N = 3 / condition). (D) Splenic *Cox10* exon 6 deletion status by PCR (N = 4 / condition). (E) *Cox10* mRNA by PCR (N = 4 - 5 / condition). Experiments were performed 3 or more times with representative data shown. \*P < 0.05., \*\* P < 0.01, \*\*\* P < 0.001.

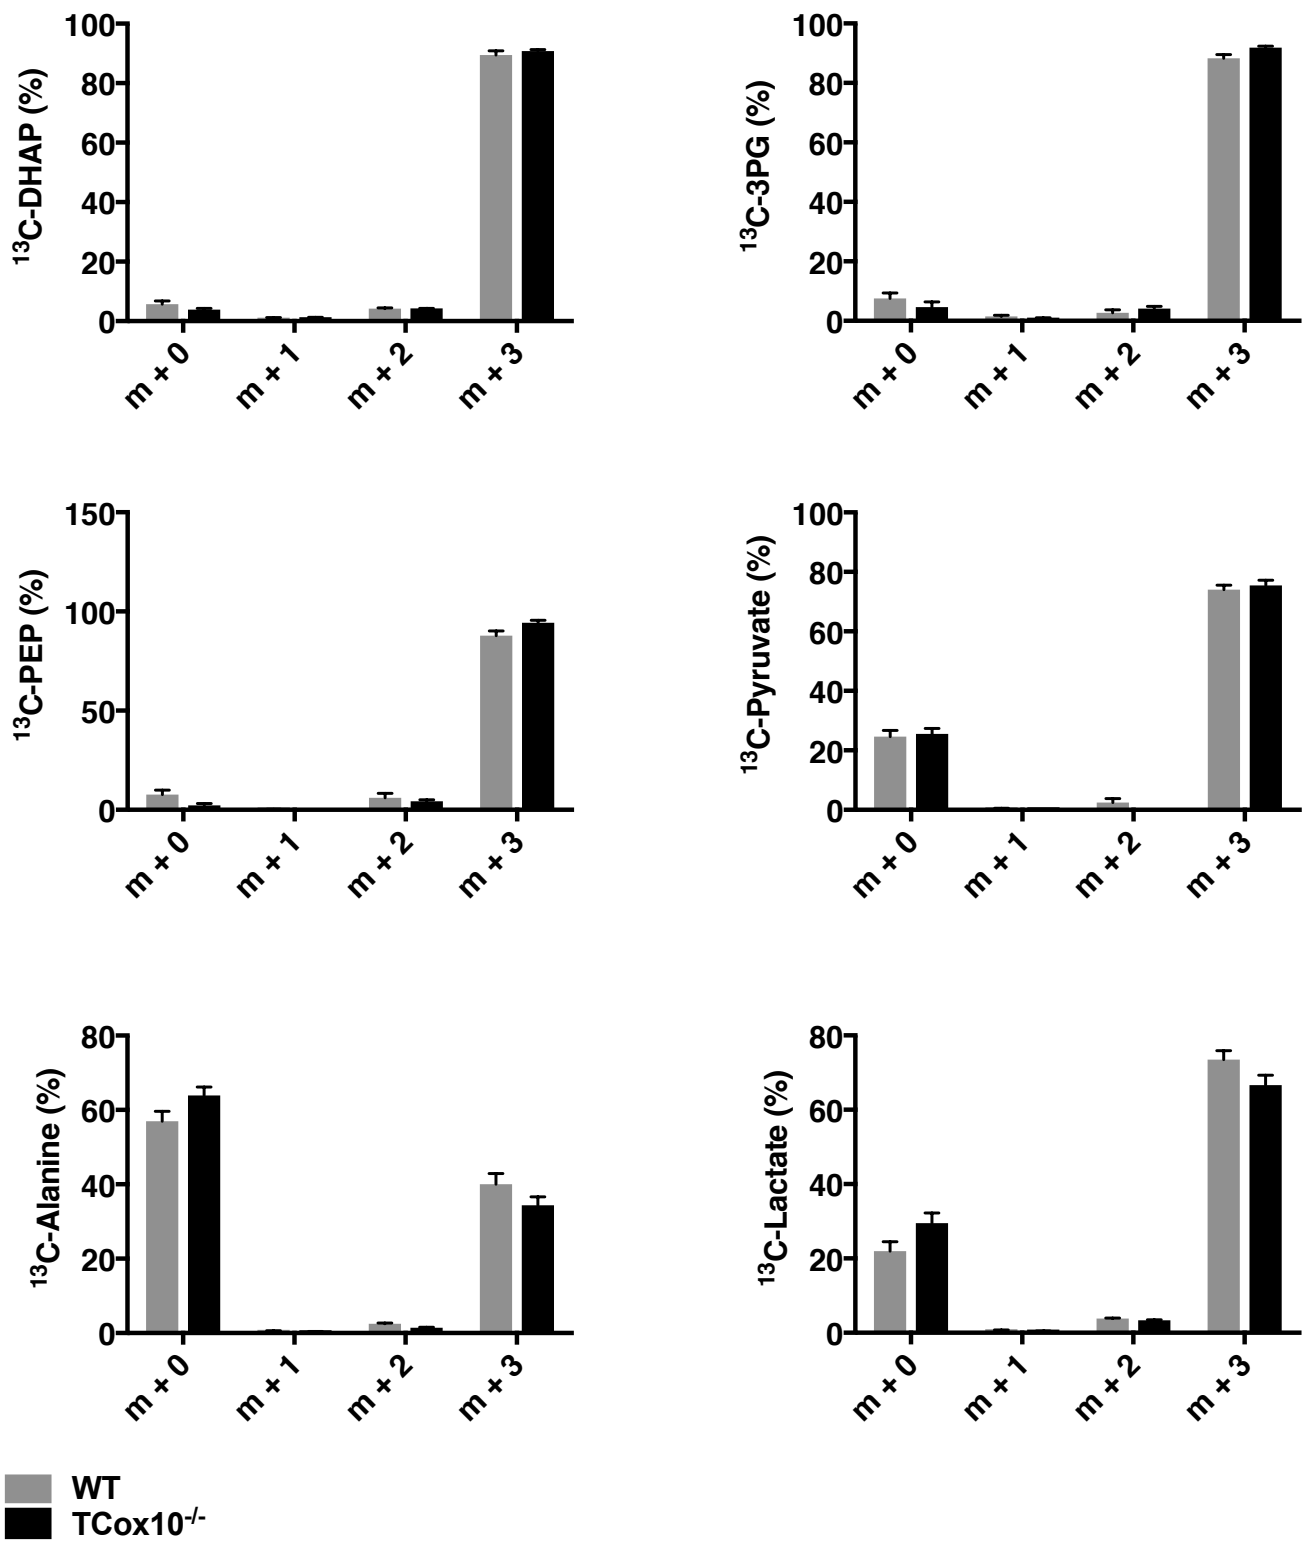

**Supplemental Figure 3: Stable isotopic tracing of glycolytic intermediates.** Related to Figure 3. WT and TCox10<sup>-/-</sup> T-cells were stimulated for 24 hours with anti-CD3/CD28. Glucose in the media was replaced with 11 mM [U <sup>13</sup>C] glucose (N = 3 / condition).

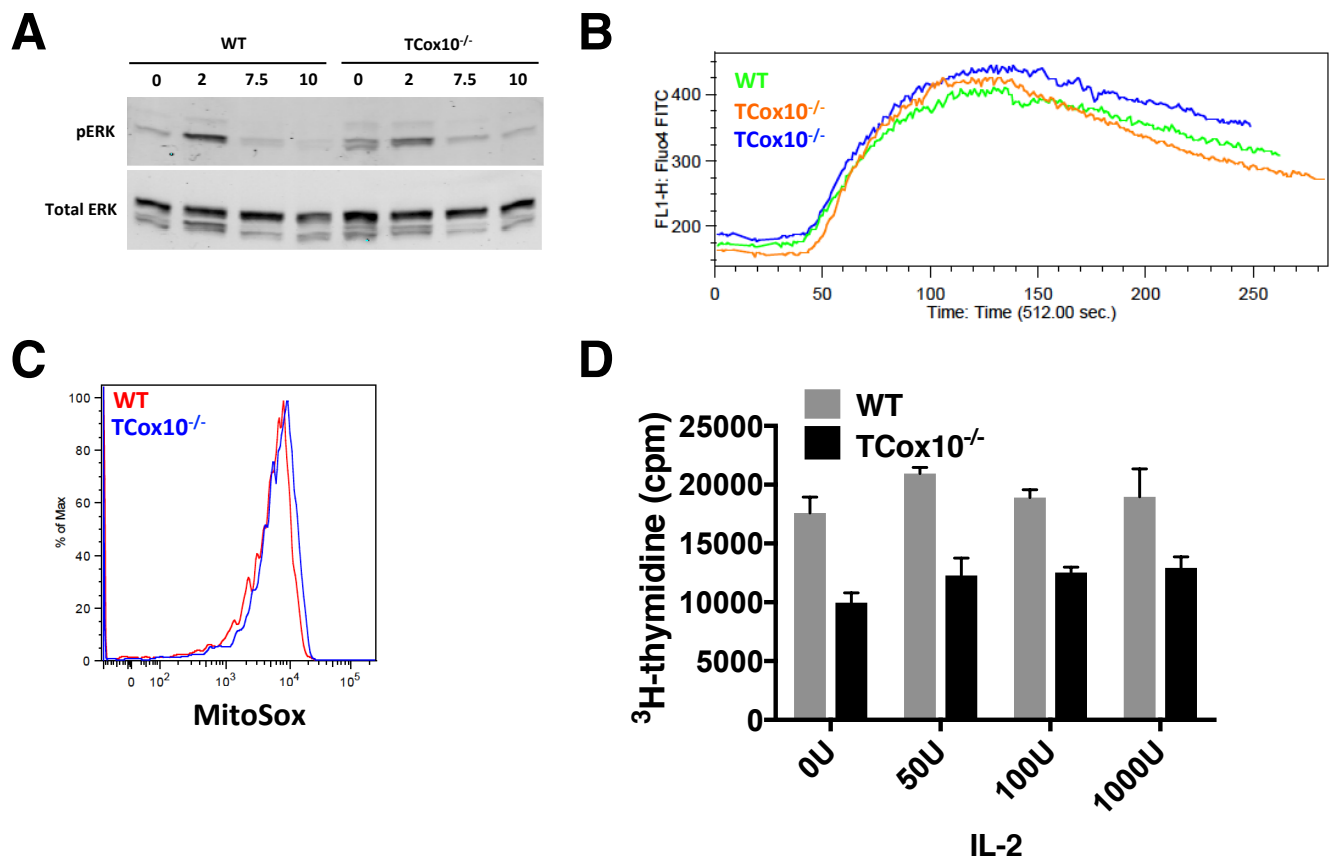

**Supplemental Figure 4: TCox10<sup>-/-</sup> T-cell activation parameters.** Related to Figure 4. Splenic T-cells were stimulated with anti-CD3/CD28 and were examined at defined timepoints. (A) ERK phosphorylation at 0, 2, 7.5 and 10 minutes. (B) Calcium flux. (C) ROS production at 24 hours (N = 3 / condition). (D) T-cell proliferation with IL-2 rescue (N = 3 / condition). Experiments were performed 3 or more times with representative data shown.

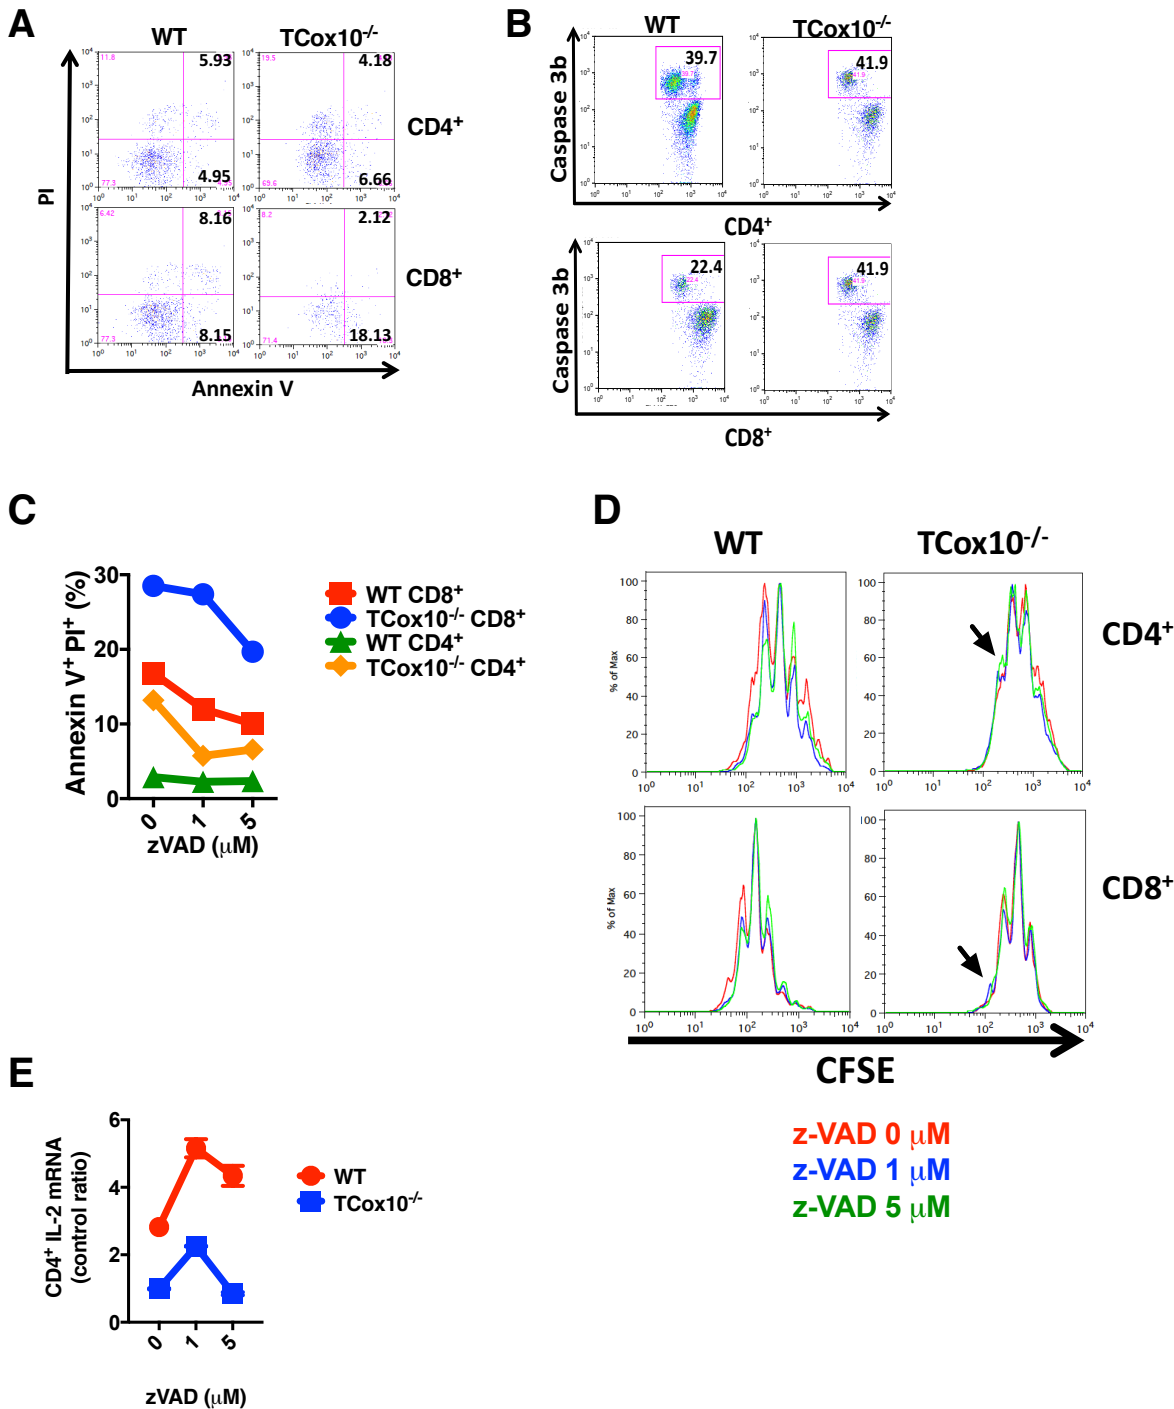

**Supplemental Figure 5: Cell death in CD4<sup>+</sup> and CD8<sup>+</sup> TCox10<sup>-/-</sup> T-cells.** Related to Figure 5. WT and TCox10<sup>-/-</sup> splenic T-cells were stimulated *in vitro* with anti-CD3/28 for 24 hours. (A) Apoptosis markers Annexin V and Propidium Iodide (PI) (N = 3 / condition). (B) Activated caspase 3 by flow cytometry (N = 3 / condition). (C) Cell death following treatment with zVAD-FMK. (D) Cell proliferation by CFSE during zVAD-FMK treatment. (E) IL-2 production following treatment with zVAD-FMK (N = 3 / condition). Experiments were performed 3 or more times with representative data shown.

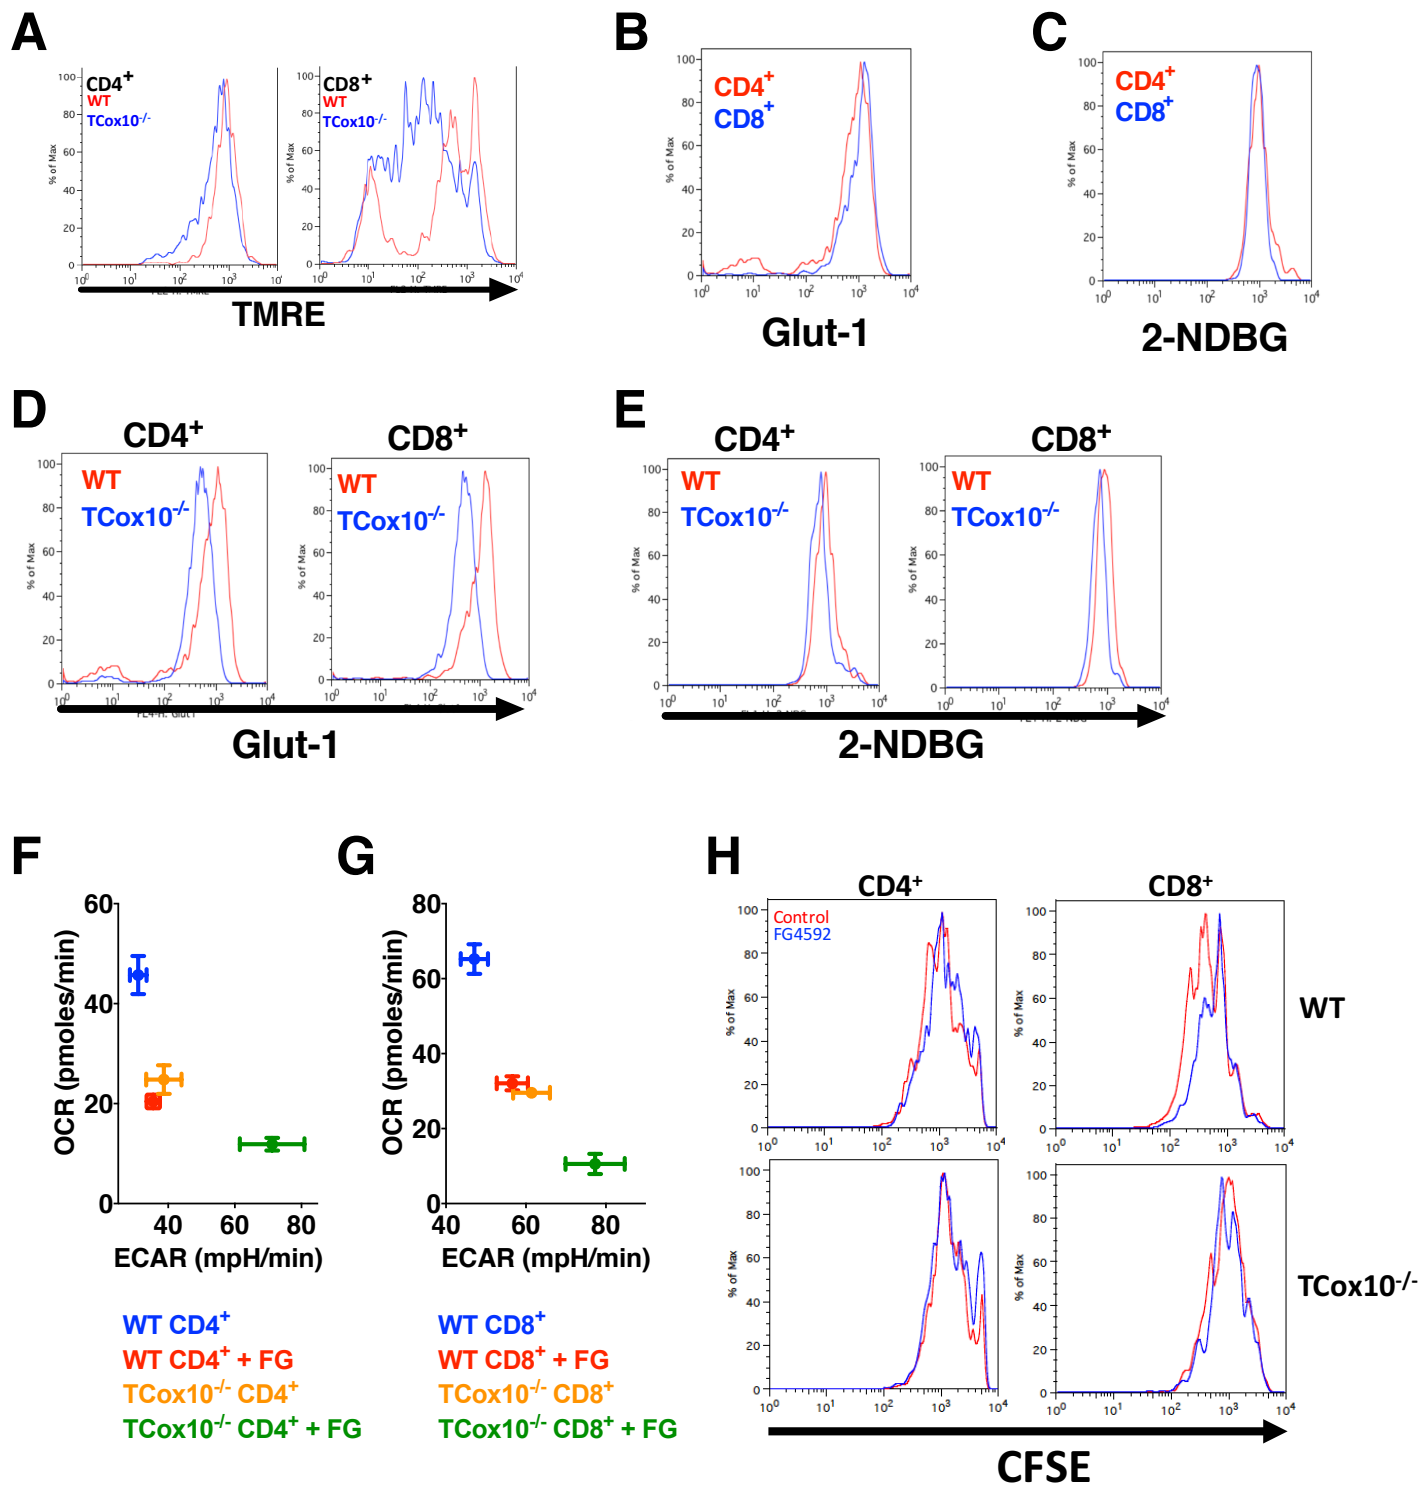

**Supplemental Figure 6: Bioenergetics of CD4<sup>+</sup> and CD8<sup>+</sup> Tcox10<sup>-/-</sup> T-cells.** Related to Figure 5. WT and Tcox10<sup>-/-</sup> splenic T-cells were stimulated *in vitro* with anti-CD3/28. (A) Mitochondrial membrane potential  $\Psi_m$  at 24 hours (N = 3 / condition). (B) Glut-1 expression on WT T-cells at 24 hours (N = 3 / condition). (C) 2-NDBG transport by WT T-cells at 24 hours (N = 3 / condition). (D) Glut-1 expression on Tcox10<sup>-/-</sup> T-cells at 24 hours (N = 3 / condition). (E) 2-NDBG transport by Tcox10<sup>-/-</sup> T-cells at 24 hours (N = 3 / condition). (F) CD4<sup>+</sup> T-cell metabotype by extracellular flux analysis at 24 hours (N = 3 - 5 / condition). (G) CD8<sup>+</sup> T-cell metabotype by extracellular flux analysis at 24 hours (N = 3 - 5 / condition). (H) T-cell proliferation during treatment with FG4592 for 3 days (N = 3 / condition). 2-NDBG = 2-(N-(7-Nitrobenz-2-oxa-1,3-diazol-4-yl)Amino)-2-Deoxyglucose; 2-DG = 2-deoxyglucose. Experiments were performed 3 or more times with representative data shown.

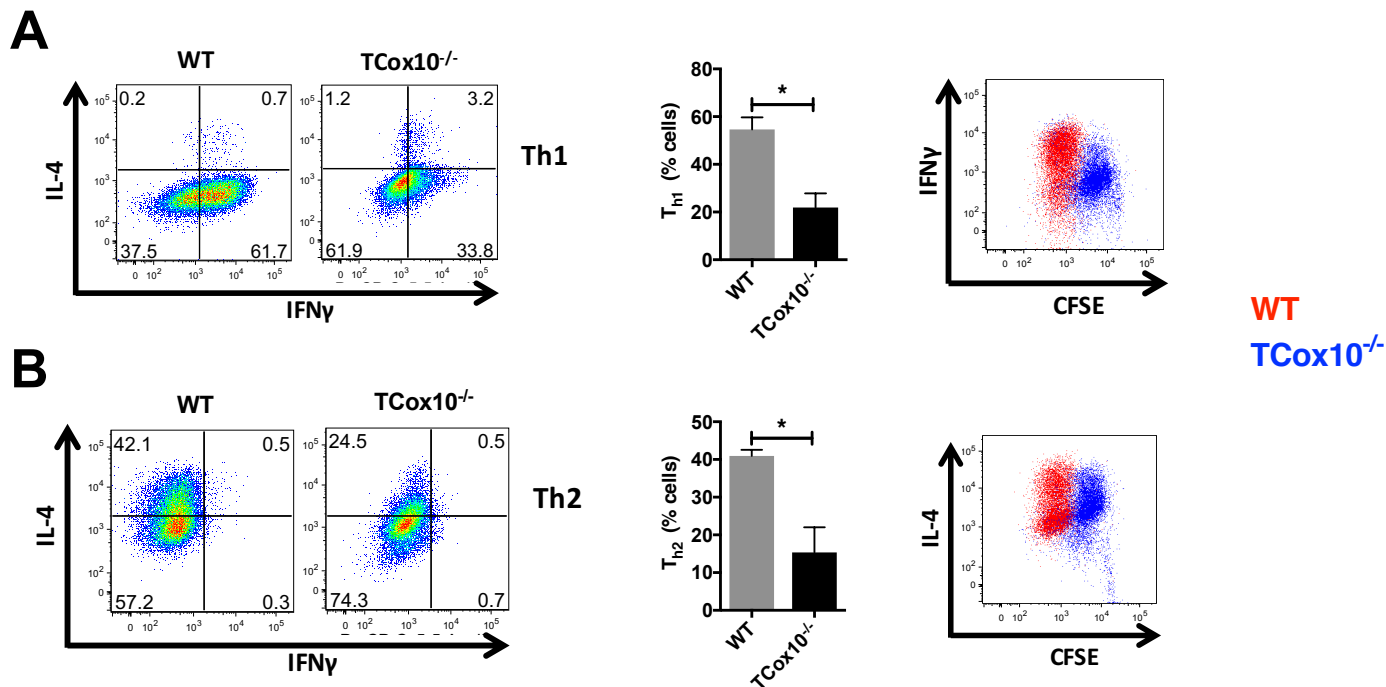

**Supplemental Figure 7: *In vitro* helper T-cell differentiation.** Related to Figure 5. Sorted naïve CD4 T cells (CD4<sup>+</sup>CD62L<sup>high</sup>CD44<sup>low</sup>CD25<sup>neg</sup>) were differentiated under T<sub>h1</sub> and T<sub>h2</sub> conditions in the presence of T-depleted splenocytes as APCs for 3 days. Cells were re-stimulated with PMA + ionomycin and Golgi stop for 4 h and stained for intracellular IFN- $\gamma$  and IL-4. (A) Th1 cells (N = 3 / condition); (B) Th2 cells (N = 3 / condition). Experiments were performed 3 or more times with representative data shown. \* P < 0.05
